# Supplementary material for: First confirmatory study on PTPRQ as an autosomal dominant non-syndromic hearing loss gene
Source: Springer Nature journal article supplement (doi:10.1186/s12967-019-2099-5), 2019-10-26
Supplement: MOESM1 [file 17310924]

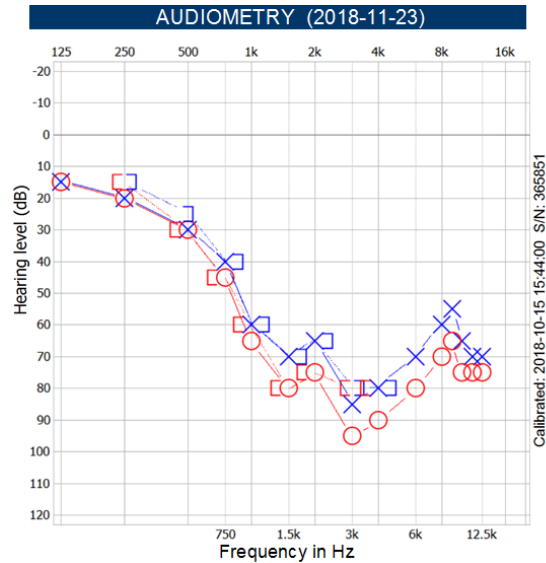

**Figure S1 Pure tone audiometry results of proband (IV.2, 35 y.o.).** Red “O” and blue “X” symbols denote air conduction thresholds in the right and left ear, respectively and “[” or “]” denote masked bone conduction. Down-sloping sensorineural hearing loss is observed.

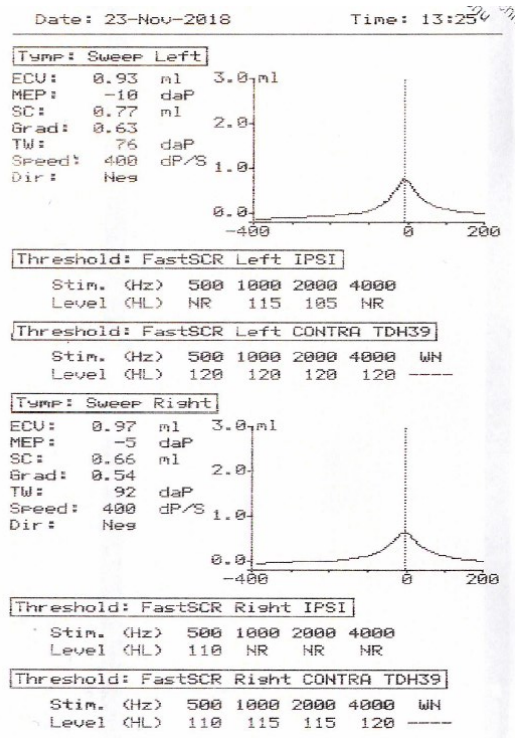

**Figure S2 Tympanometry and acoustic reflex measurements in proband (IV.2, 35 y.o.).** Tympanograms bilaterally within normal limits, acoustic reflex present for ipsi- and contralateral stimulation. For frequencies with a high degree of HL, acoustic reflex thresholds are elevated or absent for ipsilateral stimulation.

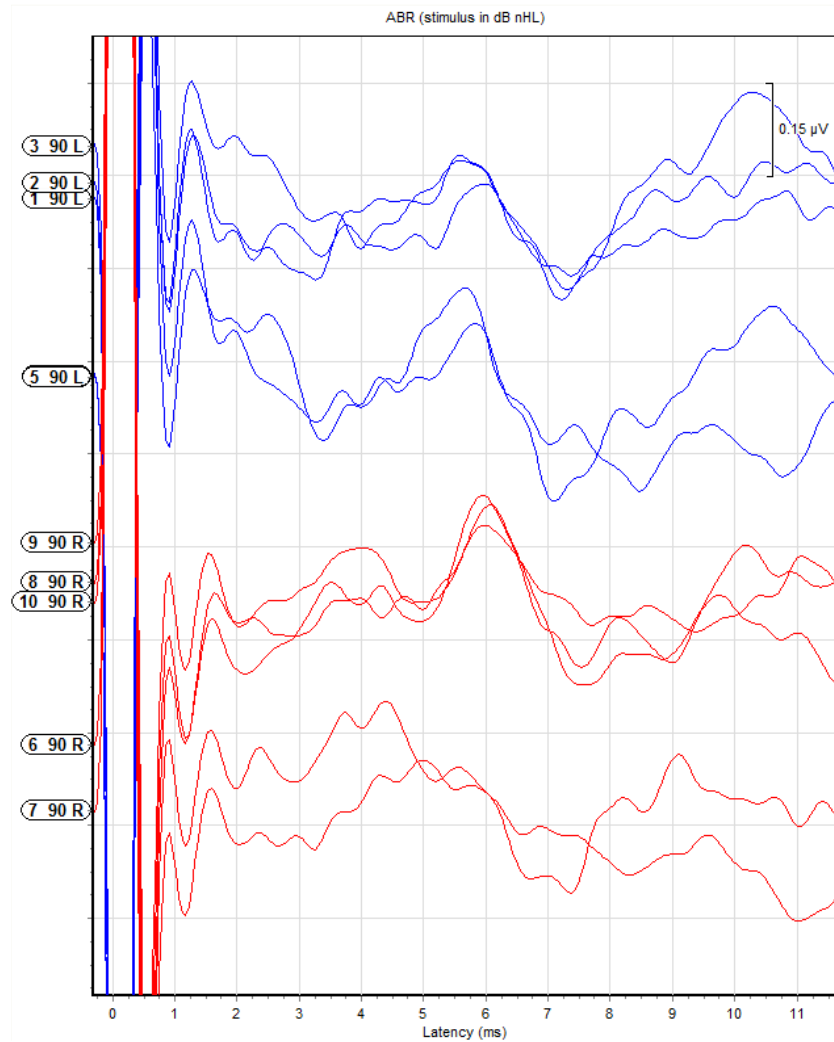

**Figure S3 Auditory brainstem responses recordings in proband (IV.2, 35 y.o.).** Measurements after click stimulus at an acoustic level of 90 dB normal hearing level (nHL) and presentation rate of 11/s. Bilaterally absent waves I-III which corresponds with the degree of HL. Wave V latencies within normal limits.

# A

Right ear

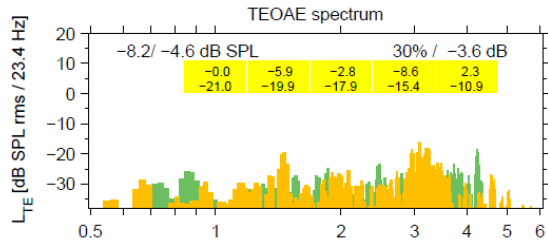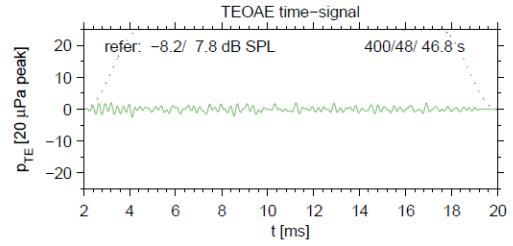

Left ear

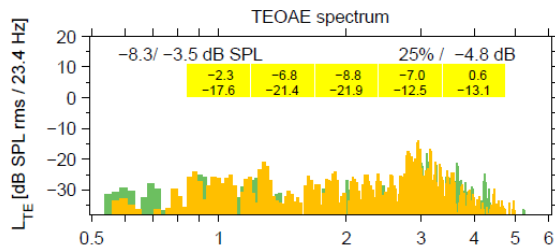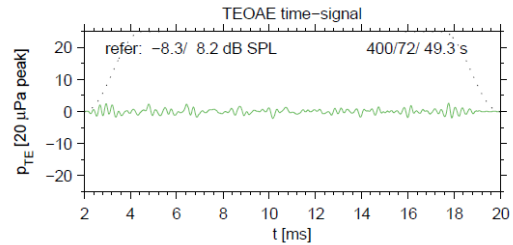

# B

Right ear

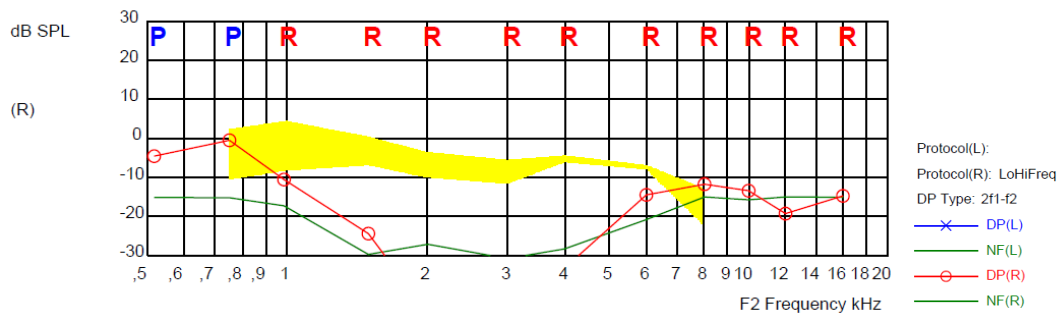

Left ear

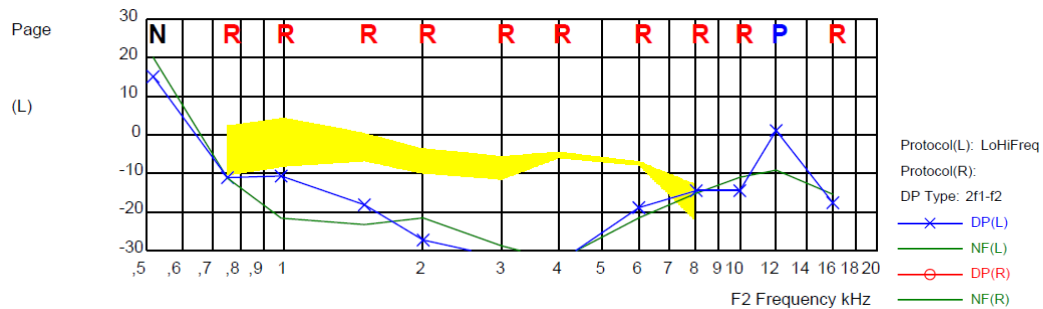

**Figure S4 Transient evoked (A) and distortion products (B) otoacoustic emissions measurements in proband (IV.2, 35 y.o.). Bilaterally otoacoustic emissions are absent.**

**A**

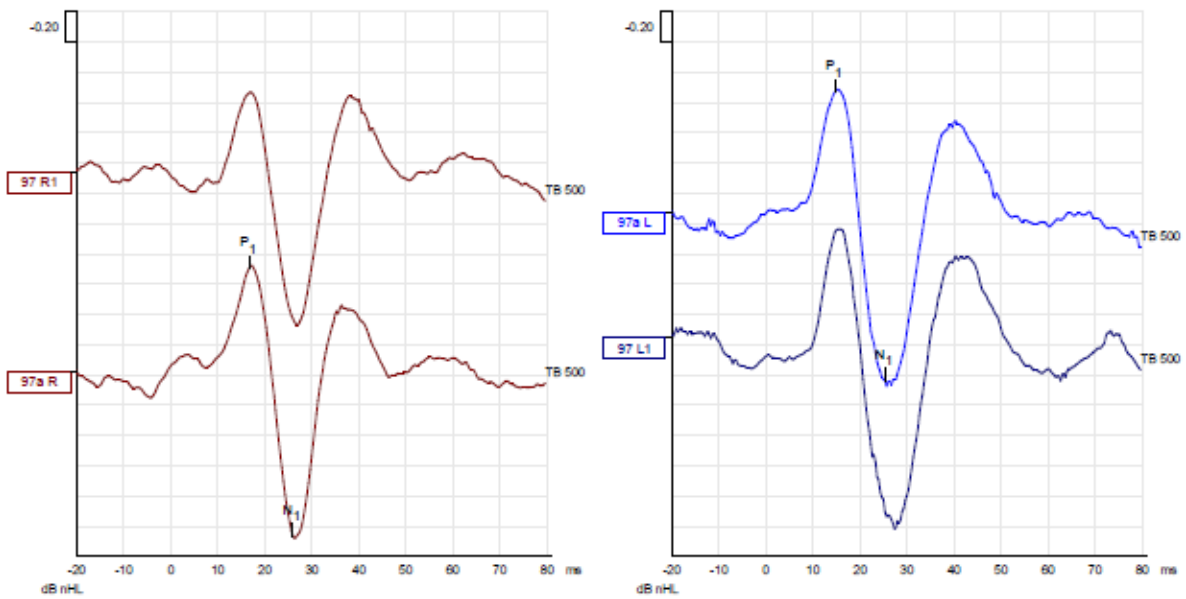

**B**

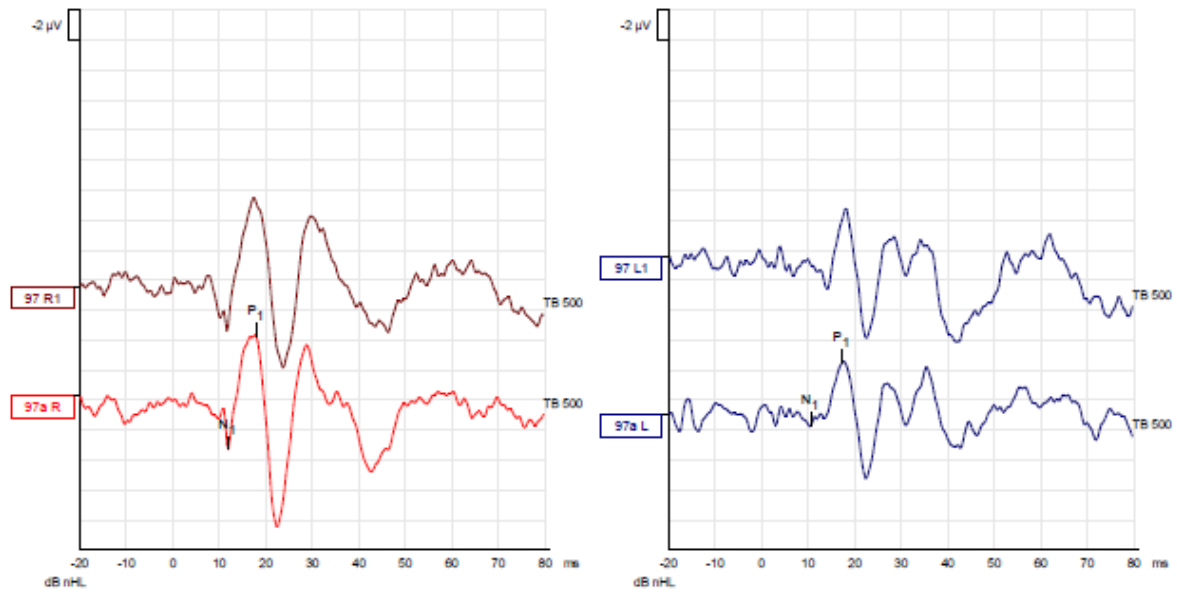

**Figure S5 Cervical (A) and ocular (B) vestibular evoked myogenic potentials (VEMP) recordings in proband (IV.2, 35 y.o.). VEMPs are bilaterally within normal limits.**

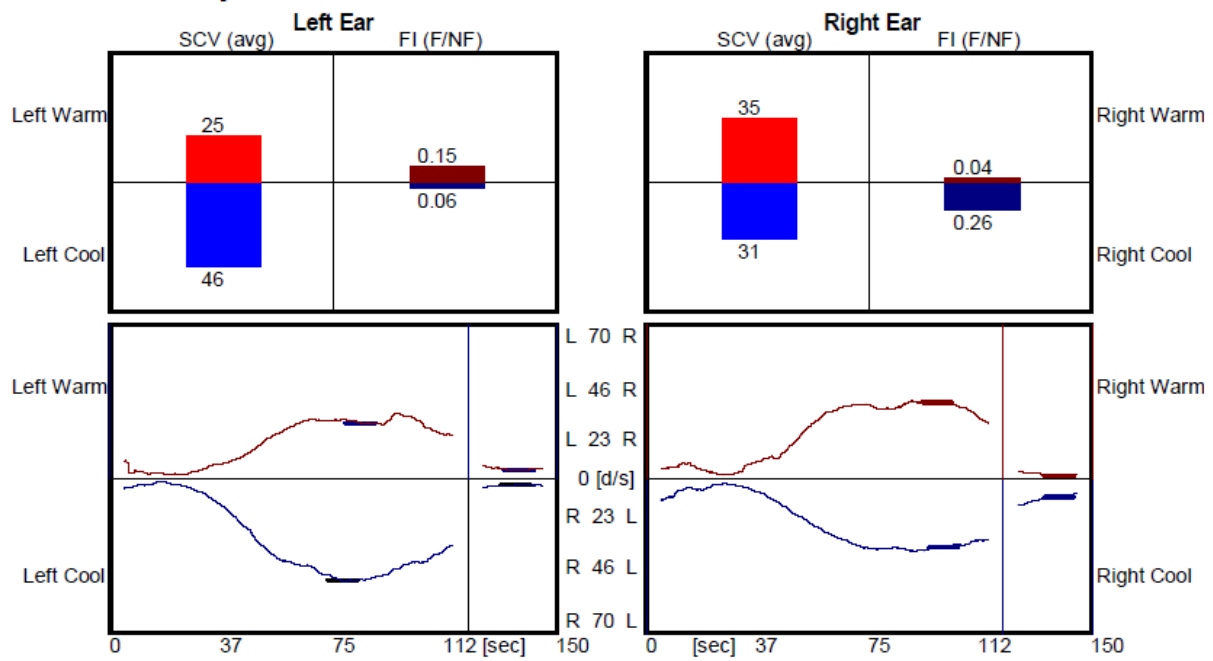

**Figure S6** Caloric test results in proband (IV.2, 35 y.o.). A caloric Reduced Vestibular Response (RVR) is within normal limits.

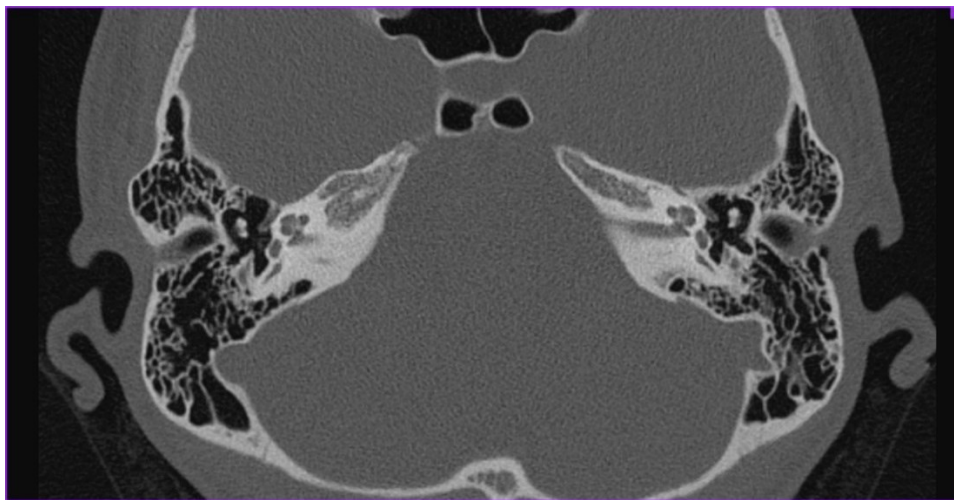

**Figure S7** Computed tomography of temporal bones imaging in proband (IV.2, 35 y.o.). The inner ear structures and ossicles are normal.
